# Supplementary material for: Induction chemotherapy for the treatment of non-endemic locally advanced nasopharyngeal carcinoma
Source: PubMed Central journal article supplement (PMC5351667; doi:10.18632/oncotarget.14279), 2016-12-27
Supplement: oncotarget-08-6763-s001.pdf [file oncotarget-08-6763-s001.pdf]

## **Induction chemotherapy for the treatment of non-endemic locally advanced nasopharyngeal carcinoma**

### **SUPPLEMENTARY TABLES**

**Supplementary Table S1: Univariate analyses of various risk factors for prognosis in 233 patients.**

**See Supplementary File 1**

**Supplementary Table S2: Toxicities related to different induction chemotherapy regimes.**

**See Supplementary File 2**
